# Supplementary material
Source: PubMed Central journal article supplement (PMC5339040)
Supplement: NIHMS818749-supplement-Supplemental_Appendices.pdf [file NIHMS818749-supplement-Supplemental_Appendices.pdf]

## **Identifying Important Gaps in Randomized Controlled Trials of Adult Cardiac Arrest Treatments: A Systematic Review of the Published Literature**

### **SUPPLEMENTAL MATERIAL**

Supplemental Appendix A. Selected Characteristics of Included Studies of RCTs of Adult Cardiac Arrest Treatments

Supplemental Appendix B. Cochrane Collaboration Risk of Bias Assessment of Included Studies of RCTs of Adult Cardiac Arrest Treatments

Supplemental References. Bibliography of Included Studies of RCTs of Adult Cardiac Arrest Treatments

Supplemental Appendix C. Electronic Search Terms within the PubMed/EMBASE/Scopus Databases

Supplemental Appendix D. PRISMA Checklist

## Supplemental Appendix A. Selected Characteristics of Included Studies of RCTs of Adult Cardiac Arrest Treatments

| Study Author/<br>Publication Year | Journal                                | Location of Arrest | Intervention Studied                                                                      | Initial Arrest Rhythm                                  | Number of Subjects | Single/Multicenter | Geographic Location | Timing of Intervention |
|-----------------------------------|----------------------------------------|--------------------|-------------------------------------------------------------------------------------------|--------------------------------------------------------|--------------------|--------------------|---------------------|------------------------|
| Abu-Laban 2002 <sup>1</sup>       | <i>New England Journal of Medicine</i> | OHCA               | 100 mg IV tissue plasminogen activator versus placebo                                     | PEA                                                    | 233                | Multicenter        | Outside U.S.        | During Cardiac Arrest  |
| Abu-Laban 2006 <sup>2</sup>       | <i>Lancet</i>                          | OHCA               | 250 mg IV aminophylline versus placebo                                                    | Asystole or PEA refractory to epinephrine and atropine | 971                | Multicenter        | Outside U.S.        | During Cardiac Arrest  |
| Allegra 2001 <sup>3</sup>         | <i>Resuscitation</i>                   | OHCA               | 2g IV magnesium sulfate versus placebo                                                    | Refractory VF                                          | 116                | Multicenter        | U.S.                | During Cardiac Arrest  |
| Arntz 2001 <sup>4</sup>           | <i>Circulation</i>                     | OHCA               | Phased chest and abdominal compression-decompression (Lifestick™) CPR versus standard CPR | VF/PEA/Asystole                                        | 50                 | Multicenter        | Outside U.S.        | During Cardiac Arrest  |
| Aufderheide 2005 <sup>5</sup>     | <i>Critical Care Medicine</i>          | OHCA               | Active versus sham ITD                                                                    | Pulseless VT/VF/PEA/Asystole                           | 230                | Multicenter        | U.S.                | During Cardiac Arrest  |
| Aufderheide 2011 <sup>6</sup>     | <i>Lancet</i>                          | OHCA               | ACD-CPR + ITD versus standard CPR                                                         | Pulseless VT/VF/PEA/Asystole                           | 1653               | Multicenter        | U.S.                | During Cardiac Arrest  |
| Aufderheide 2011 <sup>7</sup>     | <i>New England Journal of Medicine</i> | OHCA               | Active versus sham ITD                                                                    | Shockable VT/VF/PEA/Asystole                           | 8718               | Multicenter        | Inside/Outside U.S. | During Cardiac Arrest  |
| Axelsson 2006 <sup>8</sup>        | <i>Resuscitation</i>                   | OHCA               | Mechanical chest compression (LUCAS™) versus standard CPR                                 | Pulseless VT/VF/PEA/Asystole                           | 328                | Multicenter        | Outside U.S.        | During Cardiac Arrest  |
| Axelsson 2009 <sup>9</sup>        | <i>Resuscitation</i>                   | OHCA               | Mechanical ACD-CPR (LUCAS™) versus standard CPR                                           | Pulseless VT/VF/PEA/Asystole                           | 126                | Single             | Outside U.S.        | During Cardiac Arrest  |
| Baker 2008 <sup>10</sup>          | <i>Resuscitation</i>                   | OHCA               | 3 min of CPR before first defibrillation versus immediate defibrillation                  | VF                                                     | 202                | Multicenter        | Outside U.S.        | During Cardiac Arrest  |

|                              |                                                      |      |                                                                                                                     |                              |      |             |              |                            |
|------------------------------|------------------------------------------------------|------|---------------------------------------------------------------------------------------------------------------------|------------------------------|------|-------------|--------------|----------------------------|
| Baubin 1999 <sup>11</sup>    | <i>Resuscitation</i>                                 | OHCA | Standard CPR followed by ACD-CPR versus ACD-CPR only versus standard CPR                                            | Pulseless VT/VF              | 90   | Single      | Outside U.S. | During Cardiac Arrest      |
| Bender 2007 <sup>12</sup>    | <i>Resuscitation</i>                                 | OHCA | 2 ml/kg/10 min IV hypertonic saline with HES versus IV HES alone                                                    | Pulseless VT/VF/PEA/Asystole | 66   | Single      | Outside U.S. | During Cardiac Arrest      |
| Berdowski 2010 <sup>13</sup> | <i>Circulation: Arrhythmia and Electrophysiology</i> | OHCA | Use AEDs to perform postshock analysis and prompt pulse check versus resume CPR immediately after defibrillation    | Pulseless VT/VF              | 136  | Single      | Outside U.S. | During Cardiac Arrest      |
| Bernard 2002 <sup>14</sup>   | <i>New England Journal of Medicine</i>               | OHCA | Therapeutic hypothermia (33°C) versus normothermia                                                                  | VF                           | 77   | Multicenter | Outside U.S. | Post Cardiac Arrest        |
| Bernard 2010 <sup>15</sup>   | <i>Circulation</i>                                   | OHCA | Pre-hospital cooling versus cooling after hospital admission                                                        | VF                           | 234  | Multicenter | Outside U.S. | Post Cardiac Arrest        |
| Bernard 2012 <sup>16</sup>   | <i>Critical Care Medicine</i>                        | OHCA | Pre-hospital cooling versus cooling after hospital admission                                                        | Asystole or PEA              | 163  | Multicenter | Outside U.S. | Post Cardiac Arrest        |
| Bertrand 2006 <sup>17</sup>  | <i>Intensive Care Medicine</i>                       | OHCA | Constant flow insufflation of oxygen versus mechanical ventilation                                                  | VF/PEA/Asystole              | 696  | Multicenter | Outside U.S. | During/Post Cardiac Arrest |
| Bjelland 2012 <sup>18</sup>  | <i>Intensive Care Medicine</i>                       | OHCA | Propofol + remifentanyl versus midazolam + fentanyl during therapeutic hypothermia (33-34°C for 24 hours)           | Pulseless VT/VF/PEA/Asystole | 59   | Multicenter | Outside U.S. | Post Cardiac Arrest        |
| Bohn 2011 <sup>19</sup>      | <i>Resuscitation</i>                                 | OHCA | Extended feedback (addition of voice prompts during CPR) versus limited feedback (visual feedback + metronome only) | Pulseless VT/VF/PEA/Asystole | 300  | Single      | Outside U.S. | During Cardiac Arrest      |
| Bottiger 2008 <sup>20</sup>  | <i>New England Journal of Medicine</i>               | OHCA | IV tenecteplase (weight-based dosing) versus placebo                                                                | Pulseless VT/VF/PEA/Asystole | 1050 | Multicenter | Outside U.S. | During Cardiac Arrest      |

|                               |                                                          |           |                                                                                                 |                                                   |      |             |                     |                            |
|-------------------------------|----------------------------------------------------------|-----------|-------------------------------------------------------------------------------------------------|---------------------------------------------------|------|-------------|---------------------|----------------------------|
| Breil 2012 <sup>21</sup>      | <i>Resuscitation</i>                                     | OHCA      | 2 ml/kg/10 min IV hypertonic saline with HES versus IV HES alone                                | Pulseless VT/VF/PEA/Asystole                      | 203  | Multicenter | Outside U.S.        | During Cardiac Arrest      |
| Callaway 2006 <sup>22</sup>   | <i>American Journal of Cardiology</i>                    | OHCA      | 40 IU Vasopressin versus placebo                                                                | VF/PEA/Asystole                                   | 325  | Single      | U.S.                | During Cardiac Arrest      |
| Castren 2010 <sup>23</sup>    | <i>Circulation</i>                                       | OHCA      | Intra-arrest, pre-hospital transnasal evaporative cooling (RhinoChill™) versus standard of care | VF/PEA/Asystole                                   | 194  | Multicenter | Outside U.S.        | Post Cardiac Arrest        |
| Chardoli 2012 <sup>24</sup>   | <i>Chinese Journal of Traumatology - English Edition</i> | IHCA/OHCA | Echocardiography-integrated CPR versus standard CPR                                             | PEA                                               | 100  | Multicenter | Outside U.S.        | During Cardiac Arrest      |
| Choux 1995 <sup>25</sup>      | <i>Resuscitation</i>                                     | OHCA      | Repeated standard dose (1 mg IV) versus high dose (5 mg IV) of epinephrine                      | VF/EMD/Asystole                                   | 536  | Single      | Outside U.S.        | During Cardiac Arrest      |
| Debaty 2014 <sup>26</sup>     | <i>Intensive Care Med</i>                                | OHCA      | Intra-arrest therapeutic hypothermia versus TH after hospital admission                         | Pulseless VT/VF/PEA/Asystole                      | 245  | Multicenter | Outside U.S.        | During Cardiac Arrest      |
| Dorian 2002 <sup>27</sup>     | <i>New England Journal of Medicine</i>                   | OHCA      | 5 mg/kg IV amiodarone + lidocaine placebo versus 1.5 mg/kg IV lidocaine + amiodarone placebo    | Shock-resistant VF                                | 347  | Multicenter | Outside U.S.        | During Cardiac Arrest      |
| Dybvik 1995 <sup>28</sup>     | <i>Resuscitation</i>                                     | OHCA      | 250 ml IV Tribonat™ (buffer solution) versus 250 ml of 0.9% IV normal saline                    | VF after first defibrillation attempt or Asystole | 502  | Single      | Outside U.S.        | During Cardiac Arrest      |
| Fatovich 1997 <sup>29</sup>   | <i>Resuscitation</i>                                     | OHCA      | High dose (5 g) IV magnesium sulfate versus placebo                                             | Pulseless VT/VF/Asystole                          | 67   | Single      | Outside U.S.        | During/Post Cardiac Arrest |
| Freese 2013 <sup>30</sup>     | <i>Circulation</i>                                       | OHCA      | Using AEDs with a VF waveform analysis algorithm versus standard shock-first protocol           | VF                                                | 987  | Multicenter | Inside/Outside U.S. | During Cardiac Arrest      |
| Gueugniaud 1998 <sup>31</sup> | <i>New England Journal of Medicine</i>                   | OHCA      | Repeated (up to 15) high doses (5 mg IV each) versus standard doses (1 mg each) of epinephrine  | VF/PEA/Asystole                                   | 3327 | Multicenter | Outside U.S.        | During Cardiac Arrest      |

|                                  |                                                    |      |                                                                                                                             |                                                         |      |             |                     |                       |
|----------------------------------|----------------------------------------------------|------|-----------------------------------------------------------------------------------------------------------------------------|---------------------------------------------------------|------|-------------|---------------------|-----------------------|
| Gueugniaud 2008 <sup>32</sup>    | <i>New England Journal of Medicine</i>             | OHCA | 1 mg IV epinephrine + 40 IU of IV vasopressin versus 1 mg IV epinephrine + saline placebo                                   | VF after 3 failed defibrillation attempts/ PEA/Asystole | 2894 | Multicenter | Outside U.S.        | During Cardiac Arrest |
| Hallstrom 2000 <sup>33</sup>     | <i>New England Journal of Medicine</i>             | OHCA | Dispatcher-instructed bystander CPR by chest compression alone versus CPR by chest compression + mouth-to-mouth ventilation | Pulseless VT/VF/PEA/Asystole                            | 520  | Single      | U.S.                | During Cardiac Arrest |
| Hallstrom 2006 <sup>34</sup>     | <i>Journal of the American Medical Association</i> | OHCA | Automated load-distributing band (LDB-CPR) chest compression device versus manual CPR                                       | Pulseless VT/VF/PEA/Asystole                            | 767  | Multicenter | Inside/Outside U.S. | During Cardiac Arrest |
| Hassan 2002 <sup>35</sup>        | <i>Emergency Medicine Journal</i>                  | OHCA | 2 g IV magnesium sulfate versus placebo                                                                                     | VF/EMD/Asystole                                         | 105  | Multicenter | Outside U.S.        | Post Cardiac Arrest   |
| Heard 2010 <sup>36</sup>         | <i>Resuscitation</i>                               | OHCA | Mechanical device for temperature management (Arctic Sun™) versus surface cooling with standard blankets + ice packs        | Pulseless VT/VF/PEA/Asystole                            | 64   | Multicenter | U.S.                | Post Cardiac Arrest   |
| Holzer 2002 (HACA) <sup>37</sup> | <i>New England Journal of Medicine</i>             | OHCA | Therapeutic hypothermia (32-34°C for 24 hours) versus normothermia                                                          | Pulseless VT/VF                                         | 275  | Multicenter | Outside U.S.        | Post Cardiac Arrest   |
| Hostler 2011 <sup>38</sup>       | <i>British Medical Journal</i>                     | OHCA | Real-time audio and visual feedback during CPR versus standard CPR                                                          | Pulseless VT/VF/PEA/Asystole                            | 1586 | Multicenter | Inside/Outside U.S. | During Cardiac Arrest |
| Jacobs 2005 <sup>39</sup>        | <i>Emergency Medicine Australasia</i>              | OHCA | 90 seconds of CPR before defibrillation versus immediate defibrillation                                                     | Pulseless VT/VF                                         | 256  | Single      | Outside U.S.        | During Cardiac Arrest |
| Jacobs 2011 <sup>40</sup>        | <i>Resuscitation</i>                               | OHCA | 1 mg IV adrenaline versus saline placebo                                                                                    | Pulseless VT/VF/PEA/Asystole                            | 534  | Multicenter | Outside U.S.        | During Cardiac Arrest |
| Jaffe 2004 <sup>41</sup>         | <i>American Journal of Cardiology</i>              | OHCA | 200 micrograms IV isoproterenol versus no isoproterenol                                                                     | Asystole                                                | 79   | Multicenter | Outside U.S.        | During Cardiac Arrest |

|                               |                                                      |      |                                                                                                                                    |                                             |      |             |              |                       |
|-------------------------------|------------------------------------------------------|------|------------------------------------------------------------------------------------------------------------------------------------|---------------------------------------------|------|-------------|--------------|-----------------------|
| Jost 2010 <sup>42</sup>       | <i>Circulation</i>                                   | OHCA | AED CPR protocol (1 minute CPR before 1 <sup>st</sup> shock, shorter CPR interruptions, no stacked shocks) versus control protocol | VF                                          | 845  | Single      | Outside U.S. | During Cardiac Arrest |
| Kim 2007 <sup>43</sup>        | <i>Circulation</i>                                   | OHCA | In-field cooling (up to 2 L of 4°C normal saline) versus standard care                                                             | VF/PEA/Asystole                             | 125  | Multicenter | U.S.         | Post Cardiac Arrest   |
| Kim 2014 <sup>44</sup>        | <i>Journal of the American Medical Association</i>   | OHCA | Pre-hospital cooling (up to 2 L of 4°C normal saline) versus standard care                                                         | Pulseless VT/VF/PEA/Asystole                | 1359 | Multicenter | U.S.         | Post Cardiac Arrest   |
| Knor 2011 <sup>45</sup>       | <i>Signa Vitae</i>                                   | OHCA | 10,000 units of intra-arrest IV heparin administration versus standard of care (no heparin)                                        | Pulseless VT/VF/PEA/Asystole                | 63   | Multicenter | Outside U.S. | During Cardiac Arrest |
| Kovoor 2005 <sup>46</sup>     | <i>Internal Medicine Journal</i>                     | OHCA | 100 mg IV sotalol versus 100 mg IV lignocaine                                                                                      | VF and ≥ 4 defibrillatory monophasic shocks | 129  | Single      | Outside U.S. | During Cardiac Arrest |
| Kudenchuk 1999 <sup>47</sup>  | <i>New England Journal of Medicine</i>               | OHCA | 300 mg IV amiodarone versus placebo                                                                                                | Pulseless VT/VF/PEA/Asystole                | 504  | Multicenter | U.S.         | During Cardiac Arrest |
| Kudenchuk 2006 <sup>48</sup>  | <i>Circulation</i>                                   | OHCA | Transthoracic Incremental Monophasic versus Biphasic Defibrillation by Emergency Responders (TIMBER)                               | Pulseless VT/VF                             | 168  | Single      | U.S.         | During Cardiac Arrest |
| Laurent 2005 <sup>49</sup>    | <i>Journal of the American College of Cardiology</i> | OHCA | Isovolumic high-volume hemofiltration (200 mL/kg/hr over 8 hrs) +/-mild TH (32°C for 24 hrs) versus standard care                  | Pulseless VT/VF/PEA/Asystole                | 61   | Multicenter | Outside U.S. | Post Cardiac Arrest   |
| Longstreth 2002 <sup>50</sup> | <i>Neurology</i>                                     | OHCA | 2g IV Mg sulfate or 10mg IV diazepam or both versus placebo                                                                        | Pulseless VT/VF/PEA/Asystole                | 300  | Single      | U.S.         | During Cardiac Arrest |

|                                   |                                                          |      |                                                                                                                                                                                                      |                              |     |             |              |                            |
|-----------------------------------|----------------------------------------------------------|------|------------------------------------------------------------------------------------------------------------------------------------------------------------------------------------------------------|------------------------------|-----|-------------|--------------|----------------------------|
| Luiz 1996 <sup>51</sup>           | <i>Journal of Cardiothoracic and Vascular Anesthesia</i> | OHCA | ACD-CPR versus standard CPR                                                                                                                                                                          | Pulseless VT/VF/PEA/Asystole | 56  | Single      | Outside U.S. | During Cardiac Arrest      |
| Ma 2012 <sup>52</sup>             | <i>Resuscitation</i>                                     | OHCA | CPR first versus rhythm analysis for defibrillation first strategy                                                                                                                                   | Pulseless VT/VF/PEA/Asystole | 289 | Single      | Outside U.S. | During Cardiac Arrest      |
| Mader 1999 <sup>53</sup>          | <i>Resuscitation</i>                                     | OHCA | 250 mg IV aminophylline versus placebo                                                                                                                                                               | Asystole                     | 82  | Single      | U.S.         | During Cardiac Arrest      |
| Mader 2003 <sup>54</sup>          | <i>Academic Emergency Medicine</i>                       | OHCA | 250 mg IV Aminophylline versus placebo                                                                                                                                                               | Atropine-resistant asystole  | 111 | Multicenter | U.S.         | During Cardiac Arrest      |
| Mauer 1996 <sup>55</sup>          | <i>Resuscitation</i>                                     | OHCA | ACD-CPR versus standard CPR                                                                                                                                                                          | Pulseless VT/VF/PEA/Asystole | 220 | Single      | Outside U.S. | During Cardiac Arrest      |
| Mauer 1998 <sup>56</sup>          | <i>Resuscitation</i>                                     | OHCA | Measuring end tidal CO <sub>2</sub> with ACD-CPR versus standard CPR                                                                                                                                 | Pulseless VT/VF/PEA/Asystole | 120 | Single      | Outside U.S. | During Cardiac Arrest      |
| Mentzelopoulos 2009 <sup>57</sup> | <i>Archives of Internal Medicine</i>                     | IHCA | 120 IU IV vasopressin + 1 mg IV epinephrine + 40 mg IV methyl prednisolone versus 1 mg IV epinephrine + placebo during CPR and post-resuscitation hydrocortisone 300 mg IV for 7 days versus placebo | Pulseless VT/VF/PEA/Asystole | 100 | Single      | Outside U.S. | During/Post Cardiac Arrest |
| Mentzelopoulos 2013 <sup>58</sup> | <i>Journal of the American Medical Association</i>       | IHCA | 120 IU IV vasopressin + 1 mg IV epinephrine + 40 mg IV methyl prednisolone versus 1 mg IV epinephrine                                                                                                | Pulseless VT/VF/PEA/Asystole | 268 | Multicenter | Outside U.S. | During/Post Cardiac Arrest |

|                                |                                                    |           |                                                                                                               |                              |     |             |              |                       |
|--------------------------------|----------------------------------------------------|-----------|---------------------------------------------------------------------------------------------------------------|------------------------------|-----|-------------|--------------|-----------------------|
|                                |                                                    |           | + placebo during CPR and post-resuscitation hydrocortisone 300 mg IV for 7 days versus placebo                |                              |     |             |              |                       |
| Morrison 2005 <sup>59</sup>    | <i>Resuscitation</i>                               | OHCA      | Rectilinear biphasic versus monophasic damped sine defibrillation waveforms (ORBIT)                           | Pulseless VT/VF              | 169 | Multicenter | Outside U.S. | During Cardiac Arrest |
| Mukoyama 2009 <sup>60</sup>    | <i>Resuscitation</i>                               | OHCA      | Maximum of 4 injections of either 40 IU IV vasopressin versus 1mg IV epinephrine immediately after ER arrival | Pulseless VT/VF/PEA/Asystole | 336 | Single      | Outside U.S. | During Cardiac Arrest |
| Nielsen 2013 <sup>61</sup>     | <i>New England Journal of Medicine</i>             | OHCA      | Targeted temperature management at either 33°C versus 36°C                                                    | Pulseless VT/VF/PEA/Asystole | 939 | Multicenter | Outside U.S. | Post Cardiac Arrest   |
| Oksanen 2007 <sup>62</sup>     | <i>Intensive Care Med</i>                          | OHCA      | Strict (72-108 mg/dl) versus moderate (108-144 mg/dl) glucose control during first 48 hrs of ICU treatment    | Pulseless VF                 | 90  | Multicenter | Outside U.S. | Post Cardiac Arrest   |
| Olasveengen 2009 <sup>63</sup> | <i>Journal of the American Medical Association</i> | OHCA      | ACLS with IV drug administration versus ACLS without IV drug administration                                   | Pulseless VT/VF/PEA/Asystole | 851 | Single      | Outside U.S. | During Cardiac Arrest |
| Ong 2012 <sup>64</sup>         | <i>Resuscitation</i>                               | IHCA/OHCA | 1mg IV adrenaline versus 40 IU IV vasopressin                                                                 | Pulseless VT/VF/PEA/Asystole | 727 | Multicenter | Outside U.S. | During Cardiac Arrest |



|                                |                                                                   |           |                                                                                         |                              |      |             |              |                       |
|--------------------------------|-------------------------------------------------------------------|-----------|-----------------------------------------------------------------------------------------|------------------------------|------|-------------|--------------|-----------------------|
| Patrick 1995 <sup>65</sup>     | <i>American Journal of Respiratory and Critical Care Medicine</i> | IHCA/OHCA | 40 mg IV methoxamine versus 2mg IV epinephrine                                          | Pulseless VT/VF/PEA/Asystole | 145  | Single      | Outside U.S. | During Cardiac Arrest |
| Pittl 2013 <sup>66</sup>       | <i>Clinical Research in Cardiology</i>                            | IHCA/OHCA | Invasive cooling (Coolgard™) versus non-invasive surface cooling (Artic Sun™)           | Pulseless VT/VF/PEA/Asystole | 80   | Single      | Outside U.S. | Post Cardiac Arrest   |
| Plaisance 1997 <sup>67</sup>   | <i>Circulation</i>                                                | OHCA      | ACD-CPR versus standard CPR                                                             | Pulseless VT/VF/PEA/Asystole | 512  | Multicenter | Outside U.S. | During Cardiac Arrest |
| Plaisance 1999 <sup>68</sup>   | <i>New England Journal of Medicine</i>                            | OHCA      | ACD-CPR versus standard CPR                                                             | Pulseless VT/VF/PEA/Asystole | 750  | Multicenter | Outside U.S. | During Cardiac Arrest |
| Plaisance 2004 <sup>69</sup>   | <i>Resuscitation</i>                                              | OHCA      | ACD-CPR + active ITD versus ACD-CPR + sham ITD                                          | Pulseless VT/VF/PEA/Asystole | 400  | Multicenter | Outside U.S. | During Cardiac Arrest |
| Reades 2011 <sup>70</sup>      | <i>Annals of Emergency Medicine</i>                               | OHCA      | Tibial intraosseous versus humoral intraosseous versus peripheral intravenous           | Pulseless VT/VF/PEA/Asystole | 182  | Single      | U.S.         | During Cardiac Arrest |
| Rubertsson 2014 <sup>71</sup>  | <i>Journal of the American Medical Association</i>                | OHCA      | Mechanical chest compression and simultaneous defibrillation versus standard CPR (LINC) | Pulseless VT/VF/PEA/Asystole | 2589 | Multicenter | Outside U.S. | During Cardiac Arrest |
| Saissy 2000 <sup>72</sup>      | <i>Anesthesiology</i>                                             | OHCA      | Continuous insufflation of O2 versus IPPV in ACD-CPR                                    | Pulseless VT/VF/PEA/Asystole | 95   | Multicenter | Outside U.S. | During Cardiac Arrest |
| Schmidbauer 2000 <sup>73</sup> | <i>Resuscitation</i>                                              | OHCA      | High dose (5mg) versus standard dose (2.5mg) of endobronchial epinephrine               | Pulseless VT/VF/PEA/Asystole | 57   | Single      | Outside U.S. | During Cardiac Arrest |

|                              |                                                    |           |                                                                                               |                                                                      |      |             |                     |                       |
|------------------------------|----------------------------------------------------|-----------|-----------------------------------------------------------------------------------------------|----------------------------------------------------------------------|------|-------------|---------------------|-----------------------|
| Schneider 2000 <sup>74</sup> | <i>Circulation</i>                                 | OHCA      | AED with 150 J biphasic shocks versus 200-to-360 J monophasic shocks                          | VF                                                                   | 115  | Multicenter | Outside U.S.        | During Cardiac Arrest |
| Schwab 1995 <sup>75</sup>    | <i>Journal of the American Medical Association</i> | OHCA      | ACD-CPR versus Standard CPR                                                                   | VF/PEA/Asystole                                                      | 860  | Multicenter | U.S.                | During Cardiac Arrest |
| Sherman 1997 <sup>76</sup>   | <i>Pharmacotherapy</i>                             | OHCA      | High-dose (0.1 mg/kg) IV epinephrine versus standard-dose (0.01 mg/kg) IV epinephrine         | VF or Asystole                                                       | 140  | Multicenter | U.S.                | During Cardiac Arrest |
| Skogvoll 1999 <sup>77</sup>  | <i>Resuscitation</i>                               | OHCA      | ACD-CPR versus Standard CPR                                                                   | Pulseless VT/VF/PEA/Asystole                                         | 302  | Single      | Outside U.S.        | During Cardiac Arrest |
| Smekal 2011 <sup>78</sup>    | <i>Resuscitation</i>                               | OHCA      | Mechanical chest compressions (LUCAS™) versus Standard CPR                                    | Pulseless VT/VF/PEA/Asystole                                         | 148  | Multicenter | Outside U.S.        | During Cardiac Arrest |
| Stiell 1996 <sup>79</sup>    | <i>Journal of the American Medical Association</i> | IHCA/OHCA | ACD-CPR versus Standard CPR                                                                   | Pulseless VT/VF/PEA/Asystole                                         | 1784 | Multicenter | Outside U.S.        | During Cardiac Arrest |
| Stiell 2001 <sup>80</sup>    | <i>Lancet</i>                                      | IHCA      | 40 IU IV Vasopressin versus 1mg IV epinephrine                                                | Pulseless VT/VF/PEA/Asystole                                         | 200  | Multicenter | Outside U.S.        | During Cardiac Arrest |
| Stiell 2007 <sup>81</sup>    | <i>Circulation</i>                                 | OHCA      | Fixed lower energy (150-150-150 J) versus escalating higher energy (200-300-360 J)            | Pulseless VT/VF patients with initial defibrillation by biphasic AED | 221  | Multicenter | Outside U.S.        | During Cardiac Arrest |
| Stiell 2011 <sup>82</sup>    | <i>New England Journal of Medicine</i>             | OHCA      | Early-rhythm analysis (30 to 60 seconds CPR) versus delayed-rhythm analysis (180 seconds CPR) | Pulseless VT/VF/PEA/Asystole                                         | 9933 | Multicenter | Inside/Outside U.S. | During Cardiac Arrest |

|                             |                                                    |           |                                                                                          |                                          |      |             |                     |                            |
|-----------------------------|----------------------------------------------------|-----------|------------------------------------------------------------------------------------------|------------------------------------------|------|-------------|---------------------|----------------------------|
| Svensson 2010 <sup>83</sup> | <i>New England Journal of Medicine</i>             | OHCA      | Compression-only CPR versus standard CPR                                                 | Pulseless VT/VF/PEA/Asystole             | 1276 | Multicenter | Outside U.S.        | During Cardiac Arrest      |
| Takeda 2014 <sup>84</sup>   | <i>Resuscitation</i>                               | IHCA/OHCA | Pharyngeal cooling (saline 5°C into pharyngeal cuff for 120 min) versus standard of care | Pulseless VT/VF/PEA/Asystole             | 108  | Multicenter | Outside U.S.        | Post Cardiac Arrest        |
| Thel 1997 <sup>85</sup>     | <i>Lancet</i>                                      | IHCA      | IV magnesium sulfate (2 g bolus followed by 8 g over 24 hours) versus placebo            | Pulseless VT/VF/EMD/Bradycardia/Asystole | 156  | Single      | U.S.                | During/Post Cardiac Arrest |
| van Alem 2003 <sup>86</sup> | <i>Resuscitation</i>                               | OHCA      | Biphasic truncated exponential versus monophasic damped sine shocks                      | VF                                       | 120  | Multicenter | Outside U.S.        | During Cardiac Arrest      |
| Vukmir 2006 <sup>87</sup>   | <i>American Journal of Emergency Medicine</i>      | OHCA      | 1 mEq/kg IV sodium bicarbonate versus placebo                                            | Pulseless VT/VF/PEA/Asystole             | 792  | Multicenter | U.S.                | During Cardiac Arrest      |
| Wenzel 2004 <sup>88</sup>   | <i>New England Journal of Medicine</i>             | OHCA      | 2 ampules of either 40 IU IV vasopressin versus 1 mg IV epinephrine                      | VF/PEA/Asystole                          | 1186 | Multicenter | Outside U.S.        | During Cardiac Arrest      |
| Wik 2003 <sup>89</sup>      | <i>Journal of the American Medical Association</i> | OHCA      | CPR before defibrillation versus immediate defibrillation                                | Pulseless VT/VF                          | 200  | Single      | Outside U.S.        | During Cardiac Arrest      |
| Wik 2014 <sup>90</sup>      | <i>Resuscitation</i>                               | OHCA      | Integrated automated load-distributing band CPR versus standard CPR                      | Pulseless VT/VF/PEA/Asystole             | 4231 | Multicenter | Inside/Outside U.S. | During Cardiac Arrest      |
| Wolcke 2003 <sup>91</sup>   | <i>Circulation</i>                                 | OHCA      | ACD-CPR + ITD versus standard CPR                                                        | Pulseless VT/VF/PEA/Asystole             | 210  | Multicenter | Outside U.S.        | During Cardiac Arrest      |

|                              |                      |           |                                                                               |                                 |     |        |              |                       |
|------------------------------|----------------------|-----------|-------------------------------------------------------------------------------|---------------------------------|-----|--------|--------------|-----------------------|
| Woodhouse 1995 <sup>92</sup> | <i>Resuscitation</i> | IHCA/OHCA | High-dose (10 mg IV) versus standard-dose (1 mg IV) adrenaline versus placebo | Pulseless<br>VT/VF/EMD/Asystole | 194 | Single | Outside U.S. | During Cardiac Arrest |
|------------------------------|----------------------|-----------|-------------------------------------------------------------------------------|---------------------------------|-----|--------|--------------|-----------------------|

Supplementary Appendix Table A Abbreviations. ACD = active compression-decompression; AED = automated external defibrillator; CPR = cardiopulmonary resuscitation; EMD = electromechanical dissociation; IHCA = in-hospital cardiac arrest; Hydroxy ethyl starch; ITD = impedance threshold device; IV = intravenous; OHCA = out-of-hospital cardiac arrest; PEA = pulseless electrical activity; TH = therapeutic hypothermia; VT = ventricular tachycardia; VF = ventricular fibrillation; IPPV = intermittent positive pressure ventilation.

## Supplemental Appendix B. Cochrane Collaboration Risk of Bias Assessment of Included Studies of RCTs of Adult Cardiac Arrest Treatments

| Study Author/Publication Year | Trial Intervention    | Sequence Generation | Allocation Concealment | Blinding of Primary Personnel | Blinding of Primary Outcome Assessors | Blinding of Global Ordinal/ Quality-of-Life Outcome Assessors |
|-------------------------------|-----------------------|---------------------|------------------------|-------------------------------|---------------------------------------|---------------------------------------------------------------|
| Abu-Laban 2002 <sup>1</sup>   | Drug                  | Yellow              | Yellow                 | Green                         | Green                                 | Green                                                         |
| Abu-Laban 2006 <sup>2</sup>   | Drug                  | Green               | Yellow                 | Green                         | Green                                 | Green                                                         |
| Allegra 2001 <sup>3</sup>     | Drug                  | Green               | Yellow                 | Green                         | Green                                 | Yellow                                                        |
| Arntz 2001 <sup>4</sup>       | Device                | Yellow              | Yellow                 | Red                           | Yellow                                | Yellow                                                        |
| Aufderheide 2005 <sup>5</sup> | Device                | Green               | Green                  | Green                         | Green                                 | Green                                                         |
| Aufderheide 2011 <sup>6</sup> | Device                | Green               | Yellow                 | Red                           | Green                                 | Green                                                         |
| Aufderheide 2011 <sup>7</sup> | Device                | Green               | Green                  | Green                         | Green                                 | Green                                                         |
| Axelsson 2006 <sup>8</sup>    | Device                | Yellow              | Red                    | Red                           | Green                                 | Yellow                                                        |
| Axelsson 2009 <sup>9</sup>    | Device                | Green               | Red                    | Red                           | Green                                 | Grey                                                          |
| Baker 2008 <sup>10</sup>      | Protocol intervention | Yellow              | Green                  | Red                           | Green                                 | Green                                                         |
| Baubin 1999 <sup>11</sup>     | Device                | Yellow              | Red                    | Red                           | Yellow                                | Grey                                                          |
| Bender 2007 <sup>12</sup>     | Drug                  | Green               | Yellow                 | Green                         | Green                                 | Grey                                                          |
| Berdowski 2010 <sup>13</sup>  | Protocol intervention | Yellow              | Green                  | Red                           | Green                                 | Grey                                                          |
| Bernard 2002 <sup>14</sup>    | Device                | Red                 | Red                    | Red                           | Green                                 | Green                                                         |
| Bernard 2010 <sup>15</sup>    | Device                | Green               | Green                  | Red                           | Green                                 | Green                                                         |
| Bernard 2012 <sup>16</sup>    | Device                | Green               | Green                  | Red                           | Green                                 | Green                                                         |
| Bertrand 2006 <sup>17</sup>   | Drug                  | Yellow              | Yellow                 | Red                           | Green                                 | Grey                                                          |
| Bjelland 2012 <sup>18</sup>   | Drug                  | Green               | Yellow                 | Red                           | Yellow                                | Yellow                                                        |
| Bohn 2011 <sup>19</sup>       | Protocol intervention | Yellow              | Red                    | Red                           | Green                                 | Grey                                                          |
| Bottiger 2008 <sup>20</sup>   | Drug                  | Yellow              | Yellow                 | Green                         | Green                                 | Yellow                                                        |
| Breil 2012 <sup>21</sup>      | Drug                  | Green               | Green                  | Green                         | Green                                 | Green                                                         |
| Callaway 2006 <sup>22</sup>   | Drug                  | Green               | Green                  | Green                         | Green                                 | Yellow                                                        |
| Castren 2010 <sup>23</sup>    | Device                | Yellow              | Yellow                 | Red                           | Yellow                                | Red                                                           |
| Chardoli 2012 <sup>24</sup>   | Protocol intervention | Yellow              | Yellow                 | Red                           | Green                                 | Grey                                                          |
| Choux 1995 <sup>25</sup>      | Drug                  | Yellow              | Yellow                 | Green                         | Green                                 | Yellow                                                        |
| Debaty 2014 <sup>26</sup>     | Device                | Yellow              | Yellow                 | Red                           | Green                                 | Green                                                         |
| Dorian 2002 <sup>27</sup>     | Drug                  | Yellow              | Yellow                 | Green                         | Green                                 | Grey                                                          |
| Dybvik 1995 <sup>28</sup>     | Drug                  | Green               | Green                  | Green                         | Green                                 | Grey                                                          |
| Fatovich 1997 <sup>29</sup>   | Drug                  | Yellow              | Yellow                 | Green                         | Green                                 | Yellow                                                        |

|                                   |                       |  |  |  |  |  |
|-----------------------------------|-----------------------|--|--|--|--|--|
| Freese 2013 <sup>30</sup>         | Protocol intervention |  |  |  |  |  |
| Gueugniaud 1998 <sup>31</sup>     | Drug                  |  |  |  |  |  |
| Gueugniaud 2008 <sup>32</sup>     | Drug                  |  |  |  |  |  |
| Hallstrom 2000 <sup>33</sup>      | Protocol intervention |  |  |  |  |  |
| Hallstrom 2006 <sup>34</sup>      | Device                |  |  |  |  |  |
| Hassan 2002 <sup>35</sup>         | Drug                  |  |  |  |  |  |
| Heard 2010 <sup>36</sup>          | Device                |  |  |  |  |  |
| Holzer 2002 (HACA) <sup>37</sup>  | Device                |  |  |  |  |  |
| Hostler 2011 <sup>38</sup>        | Protocol intervention |  |  |  |  |  |
| Jacobs 2005 <sup>39</sup>         | Protocol intervention |  |  |  |  |  |
| Jacobs 2011 <sup>40</sup>         | Drug                  |  |  |  |  |  |
| Jaffe 2004 <sup>41</sup>          | Drug                  |  |  |  |  |  |
| Jost 2010 <sup>42</sup>           | Protocol intervention |  |  |  |  |  |
| Kim 2007 <sup>43</sup>            | Device                |  |  |  |  |  |
| Kim 2014 <sup>44</sup>            | Device                |  |  |  |  |  |
| Knor 2011 <sup>45</sup>           | Drug                  |  |  |  |  |  |
| Kovoor 2005 <sup>46</sup>         | Drug                  |  |  |  |  |  |
| Kudenchuk 1999 <sup>47</sup>      | Device                |  |  |  |  |  |
| Kudenchuk 2006 <sup>48</sup>      | Drug                  |  |  |  |  |  |
| Laurent 2005 <sup>49</sup>        | Device                |  |  |  |  |  |
| Longstreth 2002 <sup>50</sup>     | Drug                  |  |  |  |  |  |
| Luiz 1996 <sup>51</sup>           | Device                |  |  |  |  |  |
| Ma 2012 <sup>52</sup>             | Protocol intervention |  |  |  |  |  |
| Mader 1999 <sup>53</sup>          | Drug                  |  |  |  |  |  |
| Mader 2003 <sup>54</sup>          | Drug                  |  |  |  |  |  |
| Mauer 1996 <sup>55</sup>          | Device                |  |  |  |  |  |
| Mauer 1998 <sup>56</sup>          | Device                |  |  |  |  |  |
| Mentzelopoulos 2009 <sup>57</sup> | Drug                  |  |  |  |  |  |
| Mentzelopoulos 2013 <sup>58</sup> | Drug                  |  |  |  |  |  |
| Morrison 2005 <sup>59</sup>       | Device                |  |  |  |  |  |
| Mukoyama 2009 <sup>60</sup>       | Drug                  |  |  |  |  |  |
| Nielsen 2013 <sup>61</sup>        | Device                |  |  |  |  |  |
| Oksanen 2007 <sup>62</sup>        | Drug                  |  |  |  |  |  |
| Olasveengen 2009 <sup>63</sup>    | Protocol intervention |  |  |  |  |  |

|                                |                       |        |        |        |        |        |
|--------------------------------|-----------------------|--------|--------|--------|--------|--------|
| Ong 2012 <sup>64</sup>         | Drug                  | Yellow | Green  | Green  | Green  | Green  |
| Patrick 1995 <sup>65</sup>     | Drug                  | Green  | Yellow | Green  | Green  | Green  |
| Pittl 2013 <sup>66</sup>       | Device                | Green  | Yellow | Red    | Green  | Green  |
| Plaisance 1997 <sup>67</sup>   | Device                | Red    | Red    | Red    | Green  | Yellow |
| Plaisance 1999 <sup>68</sup>   | Device                | Red    | Red    | Red    | Green  | Yellow |
| Plaisance 2004 <sup>69</sup>   | Device                | Yellow | Green  | Green  | Green  | Yellow |
| Reades 2011 <sup>70</sup>      | Protocol intervention | Yellow | Yellow | Red    | Yellow | Gray   |
| Rubertsson 2014 <sup>71</sup>  | Device                | Yellow | Yellow | Red    | Green  | Yellow |
| Saissy 2000 <sup>72</sup>      | Drug                  | Yellow | Yellow | Red    | Green  | Gray   |
| Schmidbauer 2000 <sup>73</sup> | Drug                  | Yellow | Yellow | Yellow | Green  | Gray   |
| Schneider 2000 <sup>74</sup>   | Device                | Yellow | Red    | Red    | Green  | Yellow |
| Schwab 1995 <sup>75</sup>      | Device                | Red    | Red    | Red    | Green  | Yellow |
| Sherman 1997 <sup>76</sup>     | Drug                  | Green  | Green  | Green  | Green  | Yellow |
| Skogvoll 1999 <sup>77</sup>    | Device                | Green  | Green  | Red    | Yellow | Yellow |
| Smekal 2011 <sup>78</sup>      | Device                | Yellow | Yellow | Red    | Green  | Gray   |
| Stiell 1996 <sup>79</sup>      | Device                | Yellow | Green  | Red    | Green  | Green  |
| Stiell 2001 <sup>80</sup>      | Drug                  | Green  | Green  | Green  | Green  | Yellow |
| Stiell 2007 <sup>81</sup>      | Device                | Yellow | Yellow | Green  | Green  | Green  |
| Stiell 2011 <sup>82</sup>      | Protocol intervention | Yellow | Red    | Red    | Yellow | Yellow |
| Svensson 2010 <sup>83</sup>    | Protocol intervention | Green  | Green  | Red    | Green  | Gray   |
| Takeda 2014 <sup>84</sup>      | Device                | Yellow | Green  | Red    | Green  | Gray   |
| Thel 1997 <sup>85</sup>        | Drug                  | Yellow | Yellow | Green  | Green  | Yellow |
| van Alem 2003 <sup>86</sup>    | Device                | Yellow | Red    | Red    | Green  | Gray   |
| Vukmir 2006 <sup>87</sup>      | Drug                  | Yellow | Yellow | Green  | Green  | Gray   |
| Wenzel 2004 <sup>88</sup>      | Drug                  | Yellow | Yellow | Green  | Green  | Yellow |
| Wik 2003 <sup>89</sup>         | Protocol intervention | Yellow | Yellow | Red    | Green  | Green  |
| Wik 2014 <sup>90</sup>         | Device                | Yellow | Yellow | Red    | Green  | Red    |
| Wolcke 2003 <sup>91</sup>      | Device                | Green  | Red    | Red    | Green  | Yellow |
| Woodhouse 1995 <sup>92</sup>   | Drug                  | Yellow | Yellow | Green  | Green  | Gray   |

Risk of bias is denoted as low risk of bias (green box), high risk of bias (red box), and unclear risk of bias (yellow box).

For the “blinding of global ordinal/quality-of-life outcome assessors” domain, a gray box was used to indicate studies that did not report the aforementioned outcomes.

## Supplemental References. Bibliography of Included Studies of RCTs of Adult Cardiac Arrest Treatments

1. Abu-Laban RB, Christenson JM, Innes GD, et al. Tissue plasminogen activator in cardiac arrest with pulseless electrical activity. *N Engl J Med.* 2002;346(20):1522-1528.
2. Abu-Laban RB, McIntyre CM, Christenson JM, et al. Aminophylline in bradycardiac arrest: a randomised placebo-controlled trial. *Lancet.* 2006;367(9522):1577-1584.
3. Allegra J, Lavery R, Cody R, et al. Magnesium sulfate in the treatment of refractory ventricular fibrillation in the prehospital setting. *Resuscitation.* 2001;49(3):245-249.
4. Arntz HR, Agrawal R, Richter H, et al. Phased chest and abdominal compression-decompression versus conventional cardiopulmonary resuscitation in out-of-hospital cardiac arrest. *Circulation.* 2001;104(7):768-772.
5. Aufderheide TP, Pirralo RG, Provo TA, Lurie KG. Clinical evaluation of an inspiratory impedance threshold device during standard cardiopulmonary resuscitation in patients with out-of-hospital cardiac arrest. *Crit Care Med.* 2005;33(4):734-740.
6. Aufderheide TP, Frascone RJ, Wayne MA, et al. Standard cardiopulmonary resuscitation versus active compression-decompression cardiopulmonary resuscitation with augmentation of negative intrathoracic pressure for out-of-hospital cardiac arrest: a randomised trial. *Lancet.* 2011;377(9762):301-311.
7. Aufderheide TP, Nichol G, Rea TD, et al. A trial of an impedance threshold device in out-of-hospital cardiac arrest. *N Engl J Med.* 2011;365(9):798-806.
8. Axelsson C, Nestin J, Svensson L, Axelsson AB, Herlitz J. Clinical consequences of the introduction of mechanical chest compression in the EMS system for treatment of out-of-hospital cardiac arrest-a pilot study. *Resuscitation.* 2006;71(1):47-55.
9. Axelsson C, Karlsson T, Axelsson AB, Herlitz J. Mechanical active compression-decompression cardiopulmonary resuscitation (ACD-CPR) versus manual CPR according to pressure of end tidal carbon dioxide (P(ET)CO<sub>2</sub>) during CPR in out-of-hospital cardiac arrest (OHCA). *Resuscitation.* 2009;80(10):1099-1103.
10. Baker PW, Conway J, Cotton C, et al. Defibrillation or cardiopulmonary resuscitation first for patients with out-of-hospital cardiac arrests found by paramedics to be in ventricular fibrillation? A randomised control trial. *Resuscitation.* 2008;79(3):424-431.
11. Baubin M, Sumann G, Rabl W, Eibl G, Wenzel V, Mair P. Increased frequency of thorax injuries with ACD-CPR. *Resuscitation.* 1999;41(1):33-38.
12. Bender R, Breil M, Heister U, et al. Hypertonic saline during CPR: Feasibility and safety of a new protocol of fluid management during resuscitation. *Resuscitation.* 2007;72(1):74-81.
13. Berdowski J, Tijssen JG, Koster RW. Chest compressions cause recurrence of ventricular fibrillation after the first successful conversion by defibrillation in out-of-hospital cardiac arrest. *Circ Arrhythm Electrophysiol.* 2010;3(1):72-78.
14. Bernard SA, Gray TW, Buist MD, et al. Treatment of comatose survivors of out-of-hospital cardiac arrest with induced hypothermia. *N Engl J Med.* 2002;346(8):557-563.
15. Bernard SA, Smith K, Cameron P, et al. Induction of therapeutic hypothermia by paramedics after resuscitation from out-of-hospital ventricular fibrillation cardiac arrest: a randomized controlled trial. *Circulation.* 2010;122(7):737-742.
16. Bernard SA, Smith K, Cameron P, et al. Induction of prehospital therapeutic hypothermia after resuscitation from nonventricular fibrillation cardiac arrest\*. *Crit Care Med.* 2012;40(3):747-753.
17. Bertrand C, Hemery F, Carli P, et al. Constant flow insufflation of oxygen as the sole mode of ventilation during out-of-hospital cardiac arrest. *Intensive Care Med.* 2006;32(6):843-851.



18. Bjelland TW, Dale O, Kaisen K, et al. Propofol and remifentanyl versus midazolam and fentanyl for sedation during therapeutic hypothermia after cardiac arrest: a randomised trial. *Intensive Care Med.* 2012;38(6):959-967.
19. Bohn A, Weber TP, Wecker S, et al. The addition of voice prompts to audiovisual feedback and debriefing does not modify CPR quality or outcomes in out of hospital cardiac arrest--a prospective, randomized trial. *Resuscitation.* 2011;82(3):257-262.
20. Bottiger BW, Arntz HR, Chamberlain DA, et al. Thrombolysis during resuscitation for out-of-hospital cardiac arrest. *N Engl J Med.* 2008;359(25):2651-2662.
21. Breil M, Krep H, Heister U, et al. Randomised study of hypertonic saline infusion during resuscitation from out-of-hospital cardiac arrest. *Resuscitation.* 2012;83(3):347-352.
22. Callaway CW, Hostler D, Doshi AA, et al. Usefulness of vasopressin administered with epinephrine during out-of-hospital cardiac arrest. *Am J Cardiol.* 2006;98(10):1316-1321.
23. Castren M, Nordberg P, Svensson L, et al. Intra-arrest transnasal evaporative cooling: a randomized, prehospital, multicenter study (PRINCE: Pre-ROSC IntraNasal Cooling Effectiveness). *Circulation.* 2010;122(7):729-736.
24. Chardoli M, Heidari F, Rabiee H, Sharif-Alhoseini M, Shokoohi H, Rahimi-Movaghar V. Echocardiography integrated ACLS protocol versus conventional cardiopulmonary resuscitation in patients with pulseless electrical activity cardiac arrest. *Chin J Traumatol.* 2012;15(5):284-287.
25. Choux C, Gueugniaud PY, Barbieux A, et al. Standard doses versus repeated high doses of epinephrine in cardiac arrest outside the hospital. *Resuscitation.* 1995;29(1):3-9.
26. Debaty G, Maignan M, Savary D, et al. Impact of intra-arrest therapeutic hypothermia in outcomes of prehospital cardiac arrest: a randomized controlled trial. *Intensive Care Med.* 2014;40(12):1832-1842.
27. Dorian P, Cass D, Schwartz B, Cooper R, Gelaznikas R, Barr A. Amiodarone as compared with lidocaine for shock-resistant ventricular fibrillation. *N Engl J Med.* 2002;346(12):884-890.
28. Dybvik T, Strand T, Steen PA. Buffer therapy during out-of-hospital cardiopulmonary resuscitation. *Resuscitation.* 1995;29(2):89-95.
29. Fatovich DM, Prentice DA, Dobb GJ. Magnesium in cardiac arrest (the magic trial). *Resuscitation.* 1997;35(3):237-241.
30. Freese JP, Jorgenson DB, Liu PY, et al. Waveform analysis-guided treatment versus a standard shock-first protocol for the treatment of out-of-hospital cardiac arrest presenting in ventricular fibrillation: results of an international randomized, controlled trial. *Circulation.* 2013;128(9):995-1002.
31. Gueugniaud PY, Mols P, Goldstein P, et al. A comparison of repeated high doses and repeated standard doses of epinephrine for cardiac arrest outside the hospital. European Epinephrine Study Group. *N Engl J Med.* 1998;339(22):1595-1601.
32. Gueugniaud PY, David JS, Chanzy E, et al. Vasopressin and epinephrine vs. epinephrine alone in cardiopulmonary resuscitation. *N Engl J Med.* 2008;359(1):21-30.
33. Hallstrom A, Cobb L, Johnson E, Copass M. Cardiopulmonary resuscitation by chest compression alone or with mouth-to-mouth ventilation. *N Engl J Med.* 2000;342(21):1546-1553.
34. Hallstrom A, Rea TD, Sayre MR, et al. Manual chest compression vs use of an automated chest compression device during resuscitation following out-of-hospital cardiac arrest: a randomized trial. *JAMA.* 2006;295(22):2620-2628.
35. Hassan TB, Jagger C, Barnett DB. A randomised trial to investigate the efficacy of magnesium sulphate for refractory ventricular fibrillation. *Emerg Med J.* 2002;19(1):57-62.
36. Heard KJ, Peberdy MA, Sayre MR, et al. A randomized controlled trial comparing the Arctic Sun to standard cooling for induction of hypothermia after cardiac arrest. *Resuscitation.* 2010;81(1):9-14.

37. Hypothermia after Cardiac Arrest Study G. Mild therapeutic hypothermia to improve the neurologic outcome after cardiac arrest. *N Engl J Med*. 2002;346(8):549-556.
38. Hostler D, Everson-Stewart S, Rea TD, et al. Effect of real-time feedback during cardiopulmonary resuscitation outside hospital: prospective, cluster-randomised trial. *BMJ*. 2011;342:d512.
39. Jacobs IG, Finn JC, Oxer HF, Jelinek GA. CPR before defibrillation in out-of-hospital cardiac arrest: a randomized trial. *Emerg Med Australas*. 2005;17(1):39-45.
40. Jacobs IG, Finn JC, Jelinek GA, Oxer HF, Thompson PL. Effect of adrenaline on survival in out-of-hospital cardiac arrest: A randomised double-blind placebo-controlled trial. *Resuscitation*. 2011;82(9):1138-1143.
41. Jaffe R, Rubinshtein R, Feigenberg Z, et al. Evaluation of isoproterenol in patients undergoing resuscitation for out-of-hospital asystolic cardiac arrest (the Israel Resuscitation with Isoproterenol Study Prospective Randomized Clinical Trial). *Am J Cardiol*. 2004;93(11):1407-1409, A1409.
42. Jost D, Degrange H, Verret C, et al. DEFI 2005: a randomized controlled trial of the effect of automated external defibrillator cardiopulmonary resuscitation protocol on outcome from out-of-hospital cardiac arrest. *Circulation*. 2010;121(14):1614-1622.
43. Kim F, Olsufka M, Longstreth WT, Jr., et al. Pilot randomized clinical trial of prehospital induction of mild hypothermia in out-of-hospital cardiac arrest patients with a rapid infusion of 4 degrees C normal saline. *Circulation*. 2007;115(24):3064-3070.
44. Kim F, Nichol G, Maynard C, et al. Effect of prehospital induction of mild hypothermia on survival and neurological status among adults with cardiac arrest: a randomized clinical trial. *JAMA*. 2014;311(1):45-52.
45. Knor J, Pokorna M, Skulec R, et al. Targeting out-of-hospital cardiac arrest: the effect of heparin administered during cardiopulmonary resuscitation (T-ARREST). *Signa Vitae*. 2011;6(1):24-30.
46. Kovoov P, Love A, Hall J, et al. Randomized double-blind trial of sotalol versus lignocaine in out-of-hospital refractory cardiac arrest due to ventricular tachyarrhythmia. *Intern Med J*. 2005;35(9):518-525.
47. Kudenchuk PJ, Cobb LA, Copass MK, et al. Amiodarone for resuscitation after out-of-hospital cardiac arrest due to ventricular fibrillation. *N Engl J Med*. 1999;341(12):871-878.
48. Kudenchuk PJ, Cobb LA, Copass MK, Olsufka M, Maynard C, Nichol G. Transthoracic incremental monophasic versus biphasic defibrillation by emergency responders (TIMBER): a randomized comparison of monophasic with biphasic waveform ascending energy defibrillation for the resuscitation of out-of-hospital cardiac arrest due to ventricular fibrillation. *Circulation*. 2006;114(19):2010-2018.
49. Laurent I, Adrie C, Vinsonneau C, et al. High-volume hemofiltration after out-of-hospital cardiac arrest: a randomized study. *J Am Coll Cardiol*. 2005;46(3):432-437.
50. Longstreth WT, Jr., Fahrenbruch CE, Olsufka M, Walsh TR, Copass MK, Cobb LA. Randomized clinical trial of magnesium, diazepam, or both after out-of-hospital cardiac arrest. *Neurology*. 2002;59(4):506-514.
51. Luiz T, Ellinger K, Denz C. Active compression-decompression cardiopulmonary resuscitation does not improve survival in patients with prehospital cardiac arrest in a physician-manned emergency medical system. *J Cardiothorac Vasc Anesth*. 1996;10(2):178-186.
52. Ma MH, Chiang WC, Ko PC, et al. A randomized trial of compression first or analyze first strategies in patients with out-of-hospital cardiac arrest: results from an Asian community. *Resuscitation*. 2012;83(7):806-812.
53. Mader TJ, Smithline HA, Gibson P. Aminophylline in undifferentiated out-of-hospital asystolic cardiac arrest. *Resuscitation*. 1999;41(1):39-45.

54. Mader TJ, Smithline HA, Durkin L, Scriver G. A randomized controlled trial of intravenous aminophylline for atropine-resistant out-of-hospital asystolic cardiac arrest. *Acad Emerg Med*. 2003;10(3):192-197.
55. Mauer D, Schneider T, Dick W, Withelm A, Elich D, Mauer M. Active compression-decompression resuscitation: a prospective, randomized study in a two-tiered EMS system with physicians in the field. *Resuscitation*. 1996;33(2):125-134.
56. Mauer D, Schneider T, Elich D, Dick W. Carbon dioxide levels during pre-hospital active compression--decompression versus standard cardiopulmonary resuscitation. *Resuscitation*. 1998;39(1-2):67-74.
57. Mentzelopoulos SD, Zakyntinos SG, Tzoufi M, et al. Vasopressin, epinephrine, and corticosteroids for in-hospital cardiac arrest. *Arch Intern Med*. 2009;169(1):15-24.
58. Mentzelopoulos SD, Malachias S, Chamos C, et al. Vasopressin, steroids, and epinephrine and neurologically favorable survival after in-hospital cardiac arrest: a randomized clinical trial. *JAMA*. 2013;310(3):270-279.
59. Morrison LJ, Dorian P, Long J, et al. Out-of-hospital cardiac arrest rectilinear biphasic to monophasic damped sine defibrillation waveforms with advanced life support intervention trial (ORBIT). *Resuscitation*. 2005;66(2):149-157.
60. Mukoyama T, Kinoshita K, Nagao K, Tanjoh K. Reduced effectiveness of vasopressin in repeated doses for patients undergoing prolonged cardiopulmonary resuscitation. *Resuscitation*. 2009;80(7):755-761.
61. Nielsen N, Wetterslev J, Cronberg T, et al. Targeted temperature management at 33 degrees C versus 36 degrees C after cardiac arrest. *N Engl J Med*. 2013;369(23):2197-2206.
62. Oksanen T, Skrifvars MB, Varpula T, et al. Strict versus moderate glucose control after resuscitation from ventricular fibrillation. *Intensive Care Med*. 2007;33(12):2093-2100.
63. Olasveengen TM, Sunde K, Brunborg C, Thowsen J, Steen PA, Wik L. Intravenous drug administration during out-of-hospital cardiac arrest: a randomized trial. *JAMA*. 2009;302(20):2222-2229.
64. Ong ME, Tiah L, Leong BS, et al. A randomised, double-blind, multi-centre trial comparing vasopressin and adrenaline in patients with cardiac arrest presenting to or in the Emergency Department. *Resuscitation*. 2012;83(8):953-960.
65. Patrick WD, Freedman J, McEwen T, Light RB, Ludwig L, Roberts D. A randomized, double-blind comparison of methoxamine and epinephrine in human cardiopulmonary arrest. *Am J Respir Crit Care Med*. 1995;152(2):519-523.
66. Pittl U, Schratte A, Desch S, et al. Invasive versus non-invasive cooling after in- and out-of-hospital cardiac arrest: a randomized trial. *Clin Res Cardiol*. 2013;102(8):607-614.
67. Plaisance P, Adnet F, Vicaut E, et al. Benefit of active compression-decompression cardiopulmonary resuscitation as a prehospital advanced cardiac life support. A randomized multicenter study. *Circulation*. 1997;95(4):955-961.
68. Plaisance P, Lurie KG, Vicaut E, et al. A comparison of standard cardiopulmonary resuscitation and active compression-decompression resuscitation for out-of-hospital cardiac arrest. French Active Compression-Decompression Cardiopulmonary Resuscitation Study Group. *N Engl J Med*. 1999;341(8):569-575.
69. Plaisance P, Lurie KG, Vicaut E, et al. Evaluation of an impedance threshold device in patients receiving active compression-decompression cardiopulmonary resuscitation for out of hospital cardiac arrest. *Resuscitation*. 2004;61(3):265-271.
70. Reades R, Studnek JR, Vandeventer S, Garrett J. Intraosseous versus intravenous vascular access during out-of-hospital cardiac arrest: a randomized controlled trial. *Ann Emerg Med*. 2011;58(6):509-516.
71. Rubertsson S, Lindgren E, Smekal D, et al. Mechanical chest compressions and simultaneous defibrillation vs conventional cardiopulmonary resuscitation in out-of-hospital cardiac arrest: the LINC randomized trial. *JAMA*. 2014;311(1):53-61.

72. Saissy JM, Boussignac G, Cheptel E, et al. Efficacy of continuous insufflation of oxygen combined with active cardiac compression-decompression during out-of-hospital cardiorespiratory arrest. *Anesthesiology*. 2000;92(6):1523-1530.
73. Schmidbauer S, Kneifel HA, Hallfeldt KK. Endobronchial application of high dose epinephrine in out of hospital cardiopulmonary resuscitation. *Resuscitation*. 2000;47(1):89.
74. Schneider T, Martens PR, Paschen H, et al. Multicenter, randomized, controlled trial of 150-J biphasic shocks compared with 200- to 360-J monophasic shocks in the resuscitation of out-of-hospital cardiac arrest victims. Optimized Response to Cardiac Arrest (ORCA) Investigators. *Circulation*. 2000;102(15):1780-1787.
75. Schwab TM, Callahan ML, Madsen CD, Utecht TA. A randomized clinical trial of active compression-decompression CPR vs standard CPR in out-of-hospital cardiac arrest in two cities. *JAMA*. 1995;273(16):1261-1268.
76. Sherman BW, Munger MA, Foulke GE, Rutherford WF, Panacek EA. High-dose versus standard-dose epinephrine treatment of cardiac arrest after failure of standard therapy. *Pharmacotherapy*. 1997;17(2):242-247.
77. Skogvoll E, Wik L. Active compression-decompression cardiopulmonary resuscitation: a population-based, prospective randomised clinical trial in out-of-hospital cardiac arrest. *Resuscitation*. 1999;42(3):163-172.
78. Smekal D, Johansson J, Huzevka T, Rubertsson S. A pilot study of mechanical chest compressions with the LUCAS device in cardiopulmonary resuscitation. *Resuscitation*. 2011;82(6):702-706.
79. Stiell IG, Hebert PC, Wells GA, et al. The Ontario trial of active compression-decompression cardiopulmonary resuscitation for in-hospital and prehospital cardiac arrest. *JAMA*. 1996;275(18):1417-1423.
80. Stiell IG, Hebert PC, Wells GA, et al. Vasopressin versus epinephrine for in-hospital cardiac arrest: a randomised controlled trial. *Lancet*. 2001;358(9276):105-109.
81. Stiell IG, Walker RG, Nesbitt LP, et al. BIPHASIC Trial: a randomized comparison of fixed lower versus escalating higher energy levels for defibrillation in out-of-hospital cardiac arrest. *Circulation*. 2007;115(12):1511-1517.
82. Stiell IG, Nichol G, Leroux BG, et al. Early versus later rhythm analysis in patients with out-of-hospital cardiac arrest. *N Engl J Med*. 2011;365(9):787-797.
83. Svensson L, Bohm K, Castren M, et al. Compression-only CPR or standard CPR in out-of-hospital cardiac arrest. *N Engl J Med*. 2010;363(5):434-442.
84. Takeda Y, Kawashima T, Kiyota K, et al. Feasibility study of immediate pharyngeal cooling initiation in cardiac arrest patients after arrival at the emergency room. *Resuscitation*. 2014;85(12):1647-1653.
85. Thel MC, Armstrong AL, McNulty SE, Califf RM, O'Connor CM. Randomised trial of magnesium in in-hospital cardiac arrest. Duke Internal Medicine Housestaff. *Lancet*. 1997;350(9087):1272-1276.
86. van Alem AP, Chapman FW, Lank P, Hart AA, Koster RW. A prospective, randomised and blinded comparison of first shock success of monophasic and biphasic waveforms in out-of-hospital cardiac arrest. *Resuscitation*. 2003;58(1):17-24.
87. Vukmir RB, Katz L, Sodium Bicarbonate Study G. Sodium bicarbonate improves outcome in prolonged prehospital cardiac arrest. *Am J Emerg Med*. 2006;24(2):156-161.
88. Wenzel V, Krismer AC, Arntz HR, et al. A comparison of vasopressin and epinephrine for out-of-hospital cardiopulmonary resuscitation. *N Engl J Med*. 2004;350(2):105-113.
89. Wik L, Hansen TB, Fylling F, et al. Delaying defibrillation to give basic cardiopulmonary resuscitation to patients with out-of-hospital ventricular fibrillation: a randomized trial. *JAMA*. 2003;289(11):1389-1395.

90. Wik L, Olsen JA, Persse D, et al. Manual vs. integrated automatic load-distributing band CPR with equal survival after out of hospital cardiac arrest. The randomized CIRC trial. *Resuscitation*. 2014;85(6):741-748.
91. Wolcke BB, Mauer DK, Schoefmann MF, et al. Comparison of standard cardiopulmonary resuscitation versus the combination of active compression-decompression cardiopulmonary resuscitation and an inspiratory impedance threshold device for out-of-hospital cardiac arrest. *Circulation*. 2003;108(18):2201-2205.
92. Woodhouse SP, Cox S, Boyd P, Case C, Weber M. High dose and standard dose adrenaline do not alter survival, compared with placebo, in cardiac arrest. *Resuscitation*. 1995;30(3):243-249.

## Supplemental Appendix C. Electronic Search Terms within the PubMed/EMBASE/Scopus Databases

### PubMed

Therapy/Narrow[filter] AND (("heart arrest"[All Fields] OR "cardiac arrest"[All Fields]) OR ("Cardiopulmonary Resuscitation"[Mesh] OR "Heart Arrest"[Mesh])) AND ("1995/01/01"[PDAT] : "3000/12/31"[PDAT])

### EMBASE \*Note: eliminated keyword searches due to high search retrieval; all articles indexed so only Emtree terms utilized\*

'heart arrest'/exp AND 'resuscitation'/exp AND ([cochrane review]/lim OR [systematic review]/lim OR [controlled clinical trial]/lim OR [randomized controlled trial]/lim OR [meta analysis]/lim) AND (1995:py OR 1996:py OR 1997:py OR 1998:py OR 1999:py OR 2000:py OR 2001:py OR 2002:py OR 2003:py OR 2004:py OR 2005:py OR 2006:py OR 2007:py OR 2008:py OR 2009:py OR 2010:py OR 2011:py OR 2012:py OR 2013:py OR 2014:py)

### Scopus \*Note: filtered using adapted RCT strategy due to high search retrieval\*

( TITLE-ABS-KEY ( "cardiac arrest" OR "heart arrest" OR "cardiopulmonary resuscitation" ) ) AND ( TITLE-ABS-KEY ( ( clinical AND trial ) OR "clinical trial\*" OR random\* OR "random allocation" OR "therapeutic use" OR "randomized controlled trial" OR ( randomized AND controlled AND trial ) ) ) AND ( LIMIT-TO ( PUBYEAR , 2014 ) OR LIMIT-TO ( PUBYEAR , 2013 ) OR LIMIT-TO ( PUBYEAR , 2012 ) OR LIMIT-TO ( PUBYEAR , 2011 ) OR LIMIT-TO ( PUBYEAR , 2010 ) OR LIMIT-TO ( PUBYEAR , 2009 ) OR LIMIT-TO ( PUBYEAR , 2008 ) OR LIMIT-TO ( PUBYEAR , 2007 ) OR LIMIT-TO ( PUBYEAR , 2006 ) OR LIMIT-TO ( PUBYEAR , 2005 ) OR LIMIT-TO ( PUBYEAR , 2004 ) OR LIMIT-TO ( PUBYEAR , 2003 ) OR LIMIT-TO ( PUBYEAR , 2002 ) OR LIMIT-TO ( PUBYEAR , 2001 ) OR LIMIT-TO ( PUBYEAR , 2000 ) OR LIMIT-TO ( PUBYEAR , 1999 ) OR LIMIT-TO ( PUBYEAR , 1998 ) OR LIMIT-TO ( PUBYEAR , 1997 ) OR LIMIT-TO ( PUBYEAR , 1996 ) OR LIMIT-TO ( PUBYEAR , 1995 ) )

## Supplemental Appendix D. PRISMA Checklist

| Section/topic                      | #  | Checklist item                                                                                                                                                                                                                                                                                              | Reported on page # |
|------------------------------------|----|-------------------------------------------------------------------------------------------------------------------------------------------------------------------------------------------------------------------------------------------------------------------------------------------------------------|--------------------|
| <b>TITLE</b>                       |    |                                                                                                                                                                                                                                                                                                             |                    |
| Title                              | 1  | Identify the report as a systematic review, meta-analysis, or both.                                                                                                                                                                                                                                         | 1                  |
| <b>ABSTRACT</b>                    |    |                                                                                                                                                                                                                                                                                                             |                    |
| Structured summary                 | 2  | Provide a structured summary including, as applicable: background; objectives; data sources; study eligibility criteria, participants, and interventions; study appraisal and synthesis methods; results; limitations; conclusions and implications of key findings; systematic review registration number. | 2                  |
| <b>INTRODUCTION</b>                |    |                                                                                                                                                                                                                                                                                                             |                    |
| Rationale                          | 3  | Describe the rationale for the review in the context of what is already known.                                                                                                                                                                                                                              | 3                  |
| Objectives                         | 4  | Provide an explicit statement of questions being addressed with reference to participants, interventions, comparisons, outcomes, and study design (PICOS).                                                                                                                                                  | 3                  |
| <b>METHODS</b>                     |    |                                                                                                                                                                                                                                                                                                             |                    |
| Protocol and registration          | 5  | Indicate if a review protocol exists, if and where it can be accessed (e.g., Web address), and, if available, provide registration information including registration number.                                                                                                                               | N/A                |
| Eligibility criteria               | 6  | Specify study characteristics (e.g., PICOS, length of follow-up) and report characteristics (e.g., years considered, language, publication status) used as criteria for eligibility, giving rationale.                                                                                                      | 4                  |
| Information sources                | 7  | Describe all information sources (e.g., databases with dates of coverage, contact with study authors to identify additional studies) in the search and date last searched.                                                                                                                                  | 4                  |
| Search                             | 8  | Present full electronic search strategy for at least one database, including any limits used, such that it could be repeated.                                                                                                                                                                               | S.A. D             |
| Study selection                    | 9  | State the process for selecting studies (i.e., screening, eligibility, included in systematic review, and, if applicable, included in the meta-analysis).                                                                                                                                                   | 4,5                |
| Data collection process            | 10 | Describe method of data extraction from reports (e.g., piloted forms, independently, in duplicate) and any processes for obtaining and confirming data from investigators.                                                                                                                                  | 5                  |
| Data items                         | 11 | List and define all variables for which data were sought (e.g., PICOS, funding sources) and any assumptions and simplifications made.                                                                                                                                                                       | 5,6                |
| Risk of bias in individual studies | 12 | Describe methods used for assessing risk of bias of individual studies (including specification of whether this was done at the study or outcome level), and how this information is to be used in any data synthesis.                                                                                      | 6                  |
| Summary measures                   | 13 | State the principal summary measures (e.g., risk ratio, difference in means).                                                                                                                                                                                                                               | 5,6                |
| Synthesis of results               | 14 | Describe the methods of handling data and combining results of studies, if done, including measures of consistency (e.g., $I^2$ ) for each meta-analysis.                                                                                                                                                   | N/A                |

| Section/topic                 | #  | Checklist item                                                                                                                                                                                           | Reported on page #     |
|-------------------------------|----|----------------------------------------------------------------------------------------------------------------------------------------------------------------------------------------------------------|------------------------|
| Risk of bias across studies   | 15 | Specify any assessment of risk of bias that may affect the cumulative evidence (e.g., publication bias, selective reporting within studies).                                                             | N/A                    |
| Additional analyses           | 16 | Describe methods of additional analyses (e.g., sensitivity or subgroup analyses, meta-regression), if done, indicating which were pre-specified.                                                         | N/A                    |
| <b>RESULTS</b>                |    |                                                                                                                                                                                                          |                        |
| Study selection               | 17 | Give numbers of studies screened, assessed for eligibility, and included in the review, with reasons for exclusions at each stage, ideally with a flow diagram.                                          | 7                      |
| Study characteristics         | 18 | For each study, present characteristics for which data were extracted (e.g., study size, PICOS, follow-up period) and provide the citations.                                                             | 7-9, 19, 21-23, S.A. A |
| Risk of bias within studies   | 19 | Present data on risk of bias of each study and, if available, any outcome level assessment (see item 12).                                                                                                | 8, 20, S.A. B          |
| Results of individual studies | 20 | For all outcomes considered (benefits or harms), present, for each study: (a) simple summary data for each intervention group (b) effect estimates and confidence intervals, ideally with a forest plot. | N/A                    |
| Synthesis of results          | 21 | Present results of each meta-analysis done, including confidence intervals and measures of consistency.                                                                                                  | N/A                    |
| Risk of bias across studies   | 22 | Present results of any assessment of risk of bias across studies (see Item 15).                                                                                                                          | N/A                    |
| Additional analysis           | 23 | Give results of additional analyses, if done (e.g., sensitivity or subgroup analyses, meta-regression [see Item 16]).                                                                                    | N/A                    |
| <b>DISCUSSION</b>             |    |                                                                                                                                                                                                          |                        |
| Summary of evidence           | 24 | Summarize the main findings including the strength of evidence for each main outcome; consider their relevance to key groups (e.g., healthcare providers, users, and policy makers).                     | 9-12                   |
| Limitations                   | 25 | Discuss limitations at study and outcome level (e.g., risk of bias), and at review-level (e.g., incomplete retrieval of identified research, reporting bias).                                            | 12                     |
| Conclusions                   | 26 | Provide a general interpretation of the results in the context of other evidence, and implications for future research.                                                                                  | 13                     |
| <b>FUNDING</b>                |    |                                                                                                                                                                                                          |                        |
| Funding                       | 27 | Describe sources of funding for the systematic review and other support (e.g., supply of data); role of funders for the systematic review.                                                               | 14                     |

From: Moher D, Liberati A, Tetzlaff J, Altman DG, The PRISMA Group (2009). Preferred Reporting Items for Systematic Reviews and Meta-Analyses: The PRISMA Statement. PLoS Med 6(6): e1000097. doi:10.1371/journal.pmed1000097

For more information, visit: [www.prisma-statement.org](http://www.prisma-statement.org).
